# Supplementary material for: Synthesis, structure and magnetism of a unique dodecanuclearcopper(ii) ‘picture frame’ held in a 4 × 4 grid-like assemblyElectronic supplementary information (ESI) available: plot of magnetic susceptibility of 1 versus temperature. See http://www.rsc.org/suppdata/cc/b2/b210891g/
Source: Royal Society of Chemistry journal article supplement (doi:10.1039/b210891g), 2003-01-13
Supplement: b210891g.doc [file b210891g.doc]

**Supplementary data**

The Figure above represents the product of magnetic susceptibility (per mole of Cu ions) of (**1**) with temperature. The dashed line represents the simple case of non-interacting S = 1/2 ions with g = 2.
